# Supplementary material for: Randomized phase II study of preoperative Afatinib in untreated head and neck cancers: predictive and pharmacodynamic biomarkers of efficacy
Source: Research Square preprint supplement (doi:10.21203/rs.3.rs-3163648/v1), 2023-08-25
Supplement: Supplementary file 1 [file 36aaf6c5a7d2f9137ebeb95b.docx]

**Supplementary figure legends**

**Supplementary Figure 1** Workflow of translational analyses

PR, Partial Response; PD, Progressive Disease; SD, Stable Disease

**Supplementary Figure 2** Overview ofaltered signaling pathways in the whole patient population

**Supplementary Figure 3** Overview ofgene alterations (A), and altered signaling pathways (B) in Arm A (*N*=37) and Arm B (*N*=19)

**Supplementary Figure 4** Prognostic value of cell cyclealterations on overall survival (A), and progression-free survival (B)

**Supplementary Figure 5** Prognostic value of *CDKN2A/B* alterations on overall survival (A), and progression-free survival (B)

**Supplementary Figure 6** Prognostic value of tumor mutational burden (TMB) on overall survival in patients with high (*N*=6) and low (*N*=50) TMB

**Supplementary Figure 7** Gene sets which were found to be over-represented among up-regulated genes (*N*=267) in non-responder patients, as determined by Over Representation Analysis (ORA)

KEGG, Kyoto Encyclopedia of Genes datasets; FDR, false discovery rate

**Supplementary Figure 8** Prognostic value of the two clusters of patients (Cluster 1, *N*=27; Cluster 2, *N*=26) identified by unsupervised analysis on bulk gene expression data on overall survival (A), and progression-free survival (B)

**Supplementary Figure 9** Relationship between phosphorylation levels of human epidermal growth factor receptors and downstream proteins and metabolic response on FDG-PET scan according to PERCIST (responders, *N*=14; non-responders, *N*=11)

p/np, phosphoproteins/proteins
