# Supplementary material for: Randomized phase II study of preoperative Afatinib in untreated head and neck cancers: predictive and pharmacodynamic biomarkers of efficacy
Source: Research Square preprint supplement (doi:10.21203/rs.3.rs-3163648/v1), 2023-08-25
Supplement: Supplementary file 2 [file 3b468fb2f61178eb37a770de.docx]

**Supplementary Table 6.** Variation of fraction of tumor-infiltrating immune cells under afatinib according to

metabolic response on FDG-PET scan by PERCIST

| **Immune cells** | **Non-responders**  **(*N*=11)** | | | **Responders**  **(*N*=15)** | | | | **Ratio of median** | | | ***P*-value** | |
| --- | --- | --- | --- | --- | --- | --- | --- | --- | --- | --- | --- | --- |
|  | Median¶ | Min | Max | | Median¶ | Min | Max | |  | | |  |
| **B cells** | 0.8 | 0.3 | 5.3 | | 1.8 | 0.9 | 5.9 | | 2.1 | **0.02** | | | |
| **Macrophages** | 1.6 | 0.7 | 3.3 | | 1.1 | 0.6 | 5.4 | | 0.7 | 0.2 (NS) | | | |
| **Monocytes** | 0 | -0.01 | 0.03 | | 0 | 0 | 0.09 | | - | 0.2 (NS) | | | |
| **Neutrophils** | -0.005 | -0.03 | 0.1 | | -0.007 | -0.05 | 0.02 | | 1.4 | 0.6 (NS) | | | |
| **NK cells** | 1.4 | 0.3 | 2.5 | | 1.3 | 0 | 3 | | 0.9 | 0.9 (NS) | | | |
| **T cells CD4+** | 1.4 | 0.2 | 5.8 | | 1.4 | 0.4 | 9.5 | | 1.1 | 0.6 (NS) | | | |
| **T cells CD8+** | 0.003 | -0.004 | 0.03 | | 0 | -0.05 | 0.2 | | 0 | 0.4 (NS) | | | |
| **Uncharacterized cells$** | 0.9 | 0.7 | 1.3 | | 0.9 | 0.5 | 1.2 | | 1.1 | 0.6 (NS) | | | |

$Uncharacterized cells are representative of cells outside immune subtypes, including tumor cells; ¶Median post-afatinib/pre-afatinib fractions were computed in B cells, macrophages, NK cells, T cells CD4+ and CD8+, and uncharacterized cells; Median immune cell fractions derived by subtracting the post-afatinib cell fraction from the pre-afatinib cell fraction were computed in monocytes, neutrophils, and T cells CD8+; NS, not significant
