# Supplementary material for: Randomized phase II study of preoperative Afatinib in untreated head and neck cancers: predictive and pharmacodynamic biomarkers of efficacy
Source: Research Square preprint supplement (doi:10.21203/rs.3.rs-3163648/v1), 2023-08-25
Supplement: Supplementary file 4 [file 6c8bf9eadb1e3389b9aefcfb.docx]

**Supplementary Table 2.** Efficacy of preoperative afatinib *versus* no treatment on CT scan/MRI according to RECIST1.1 and FDG-PET scan according to PERCIST

| n (%) | CT scan/MRI | | FDG-PET scan | |
| --- | --- | --- | --- | --- |
| **Arm A** | **Arm B** | **Arm A** | **Arm B** |
| **(*N*=41)** | **(*N*=18)** | **(*N*=41)** | **(*N*=18)** |
| **PR** | 3 (7.3%) | 0 | 24 (58.5%) | 0 |
| **SD** | 34 (82.9%) | 14 (77.7%) | 14 (34.1%) | 13 (72.2%) |
| **PD** | 0 | 3 (16.6%) | 1 (2.4%) | 3 (16.7%) |
| **Non-evaluable** | 4 (9.8%) | 1 (5.7%) | 2 (5.0%) | 2 (11.1%) |
| ***P*-value** | **0.03** | | **< 0.01** | |

Abbreviations: SD, stable disease; PD, progressive disease; PR, partial response
